# Supplementary material for: Geographical and Temporal Variability of Ultra-Processed Food Consumption in the Spanish Population: Findings from the DRECE Study
Source: MDPI journal article supplement (doi:10.3390/nu14153223), 2022-08-06
Supplement: s1 [file s1]

**Table S1: Classification of items of the food frequency questionnaires according to degree of processing (NOVA classification)**

| <b>NOVA GROUPS</b>                                                                                                                                                                                                                                                                                                                                                                                                                                                                                                                  |
|-------------------------------------------------------------------------------------------------------------------------------------------------------------------------------------------------------------------------------------------------------------------------------------------------------------------------------------------------------------------------------------------------------------------------------------------------------------------------------------------------------------------------------------|
| <b>Unprocessed or minimally processed foods (Group 1)</b><br>Fruit, vegetables, legumes, eggs, meats, poultry, fish and seafood, nuts, plain yogurt, milk (whole, semi-skimmed, and non-fat), natural juice, coffee and tea                                                                                                                                                                                                                                                                                                         |
| <b>Processed culinary ingredients (Group 2)</b><br>Sugar, honey, jam, vegetable oils (olive, sunflower) and butter                                                                                                                                                                                                                                                                                                                                                                                                                  |
| <b>Processed foods (Group 3)</b><br>Cheeses, cured traditional ham, canned fish, breads (white and whole), olives, beer and wine                                                                                                                                                                                                                                                                                                                                                                                                    |
| <b>Ultra-processed foods (Group 4)</b><br>Ham, processed meat (cold cuts, sausage, hamburger), pate, foie-gras, ultra-processed cheese, salty snacks, pizza, sauces and dressings, liquors, sugar sweetened beverages, low calorie sugar sweetened beverages, juice boxes, milkshakes, cookies, chocolate cookies, muffins, doughnuts, cakes or other non-handmade pastries, churros, chocolates and candies, breakfast cereals, sweetened yoghurt, sugared ‘fruit’ yoghurts, Petit Suisse, dairy desserts, ice cream and margarine |

**Table S2: Demographic characteristics of the DRECE cohorts**

|                                                  | <b>N</b> | <b>N included</b> | <b>Age (years)</b>    | <b>Sex (male)</b> | <b>BMI (kg/m<sup>2</sup>)</b> |
|--------------------------------------------------|----------|-------------------|-----------------------|-------------------|-------------------------------|
| <b>DRECE I 1991</b>                              | 4787     | 4679              | 30.56 (15.61) [5-60]  | 2288 (48.90%)     | 24.24 (5.04)                  |
| <b>DRECE II 1996</b>                             | 1079     | 928               | 46.56 (14.78) [10-73] | 566 (60.99%)      | 27.47 (4.68)                  |
| <b>DRECE III 2004</b>                            | 2009     | 1065              | 45.84 (15.99) [5-73]  | 475 (44.60%)      | 27.61 (5.24)                  |
| <b>DRECE IV 2008</b>                             | 5038     | 4835              | 43.73 (14.65) [15-74] | 2257 (46.68%)     | 26.22 (4.18)                  |
| Data is shown as mean (SD), [min.-max.] or N (%) |          |                   |                       |                   |                               |
